# Supplementary material for: “Cancer 2015”: A Prospective, Population-Based Cancer Cohort—Phase 1: Feasibility of Genomics-Guided Precision Medicine in the Clinic
Source: MDPI journal article supplement (doi:10.3390/jpm5040354), 2015-10-29
Supplement: s1 [file s1]

# Supplementary Materials

**Table S1.** Cancer 2015 registry completeness by data element as at 1 July 2015.

| Data Element Collected                                  | Percentage Complete (%) |
|---------------------------------------------------------|-------------------------|
| PatientSecondaryContact_PostCode Complete               | 100.0                   |
| PatientPastHistoryOfCancer_CancerType Complete          | 100.0                   |
| PatientAddress_StreetNo Complete                        | 100.0                   |
| PatientAddress_State Complete                           | 100.0                   |
| PatientAddress_PostCode Complete                        | 100.0                   |
| Patient_Surname Complete                                | 100.0                   |
| Patient_PatientDOB Complete                             | 100.0                   |
| Patient_GenderId Complete                               | 100.0                   |
| Patient_FirstName Complete                              | 100.0                   |
| Patient_DateOfBirth Complete                            | 100.0                   |
| Patient_CountryOfBirth Complete                         | 99.9                    |
| Patient_PatientURN Complete                             | 99.6                    |
| PatientAddress_Suburb Complete                          | 99.3                    |
| Patient_MedicareNumber Complete                         | 99.1                    |
| PatientAddress_StreetName Complete                      | 98.7                    |
| PatientPastHistoryOfCancer_TreatingInstitution Complete | 98.7                    |
| PatientAddress_StreetNo Complete                        | 98.6                    |
| Patient_IndigenousStatusId Complete                     | 98.3                    |
| PatientAddress_TelephoneNumber Complete                 | 97.6                    |
| PatientPresentation_HospitalInsurance Complete          | 97.0                    |
| PatientPresentation_PresentationMode Complete           | 96.6                    |
| PatientPresentation_PriorChemotherapy Complete          | 96.5                    |
| PatientPresentation_InfieldRadiotherapy Complete        | 96.5                    |
| PatientSecondaryContact_FirstName Complete              | 96.4                    |
| PatientPresentation_SmokingStatus Complete              | 95.9                    |
| PatientPresentation_ECOG Complete                       | 95.5                    |
| PatientSecondaryContact_Surname                         | 95.1                    |
| Patient_NextFollowupDate Complete                       | 94.7                    |
| PatientSecondaryContact_TelephoneNumber Complete        | 92.5                    |
| Patient_ConsentForOtherStudies Complete                 | 91.4                    |
| PatientPresentation_CharlsonIndex Complete              | 90.0                    |
| PatientSecondaryContact_Suburb Complete                 | 80.7                    |
| PatientSecondaryContact_StreetName Complete             | 80.4                    |
| PatientSecondaryContact_StreetNo Complete               | 79.5                    |
| Patient_MaritalStatus Complete                          | 73.1                    |
| PatientSecondaryContact_RelationshipToPatient Complete  | 71.3                    |
| PatientFamilyHistoryOfCancer_Relation Complete          | 68.4                    |
| Patient_OtherLanguage Complete                          | 62.7                    |
| Patient_EducationAttained Complete                      | 60.0                    |
| PatientAddress_EmailAddress Complete                    | 33.5                    |
| PatientSyndrome_Syndrome Complete                       | 2.3                     |
| DiagnosisTreatment_DiagnosisDate Complete               | 99.3                    |
| DiagnosisTreatment_TumourStream Complete                | 99.3                    |
| DiagnosisTreatment_TreatmentIntent Complete             | 98.5                    |

Table S1. Cont.

| Data Element Collected                                    | Percentage Complete (%) |
|-----------------------------------------------------------|-------------------------|
| DiagnosisTreatment_TumourSite Complete                    | 98.2                    |
| DiagnosisTreatment_ReferraltoPalliativeCareUnit Complete  | 98.1                    |
| DiagnosisTreatment_Radiotherapy Complete                  | 97.4                    |
| DiagnosisTreatment_Chemotherapy Complete                  | 97.2                    |
| DiagnosisTreatment_Morphology Complete                    | 96.1                    |
| DiagnosisTreatment_FormalStage Complete                   | 95.4                    |
| DiagnosisTreatment_CancerClinicalTrial Complete           | 94.9                    |
| DiagnosisTreatment_Surgery Complete                       | 92.5                    |
| DiagnosisTreatment_AttachedReports Complete               | 90.7                    |
| DiagnosisTreatment_StagingSystem Complete                 | 87.7                    |
| DiagnosisTreatment_Stage Complete                         | 83.8                    |
| DiagnosisTreatment_StagingMethod Complete                 | 68.8                    |
| FollowupOutcomes_Status Complete                          | 100.0                   |
| FollowupOutcomes_FollowUpDate Complete                    | 100.0                   |
| FollowupOutcomes_DiseaseRecurredOrProgressed Complete     | 99.9                    |
| FollowupOutcomes_NextFollowupDate Complete                | 97.9                    |
| FollowupOutcomes_ECOG Complete                            | 97.1                    |
| FollowupOutcomes_TreatmentSummary Complete                | 91.8                    |
| FollowupOutcomes_Chemotherapy Complete                    | 91.2                    |
| FollowupOutcomes_PallativeRefDate Complete                | 90.8                    |
| FollowupOutcomes_ReferraltoPalliativeCareUnit Complete    | 90.0                    |
| FollowupOutcomes_Radiotherapy Complete                    | 88.8                    |
| FollowupOutcomes_CancerClinicalTrial Complete             | 81.7                    |
| FollowupOutcomes_Surgery Complete                         | 81.4                    |
| FollowupOutcomes_CauseofDeath Complete                    | 71.9                    |
| FollowupOutcomes_DiseaseRecurredOrProgressedDate Complete | 29.2                    |
| FollowupOutcomes_DeathDate Complete                       | 14.5                    |
| QualityofLifeSurveys_EQ-5DSurveyDate Complete             | 98.1                    |
| QualityofLifeSurveys_EQ-C30SurveyDate Complete            | 98.1                    |
| QualityofLifeSurveys_EQ-8DSurveyDate Complete             | 98.0                    |
| Biospecimens_BloodSampleNumber Complete                   | 86.5                    |
| Biospecimens_BloodCollectionDate Complete                 | 86.4                    |
| Biospecimens_SampleNumber Complete                        | 78.1                    |
| Biospecimens_TumourCollectionDate Complete                | 77.4                    |

## Cancer 2015\_List of Data Elements

## 1. Patient Registration

Table S2. Data elements and attributes.

| Element Name                    | Type<br>(Fixed/Text)      | Length                       | Format       | Source<br>Self-reported=Y<br>or Records=N |
|---------------------------------|---------------------------|------------------------------|--------------|-------------------------------------------|
| <b>Patient Details</b>          |                           |                              |              |                                           |
| ID Number                       | Text                      | 12                           | nn.nn.nnnnn  | Auto-generated                            |
| Surname                         | Text                      | 250                          |              | Y                                         |
| First Name                      | Text                      | 250                          |              | Y                                         |
| Middle Name                     | Text                      | 20                           |              | Y                                         |
| Date of birth                   | Date                      | Date picker                  | dd/mm/yyyy   | Y                                         |
| Gender                          | Single select Drop down   | 250                          |              | Y                                         |
| Medicare Card<br>Number         | Number                    | 10                           | nnnn-nnnnn-n | N                                         |
| Country of birth                | Single select Drop down   | 250                          |              | Y                                         |
| Languages other than<br>English | Text                      | 250                          |              | Y                                         |
| Indigenous Status               | Single select Drop down   |                              |              | Y                                         |
| Registered at<br>Institution    | Single select drop down   |                              |              | N                                         |
| Email Address                   | Text                      | 250                          |              | Y                                         |
| Telephone Number                | Number                    | 10                           |              | Y                                         |
| Unit No.                        | Text                      | 20                           |              | Y                                         |
| Street No.                      | Text                      | 20                           |              | Y                                         |
| Street Name                     | Text                      | 250                          |              | Y                                         |
| Suburb/Locality                 | Text                      | 250                          |              | Y                                         |
| State                           | Drop down                 |                              |              | Y                                         |
| Postcode                        | Number                    |                              | nnnn         | Y                                         |
| <b>Secondary Contact</b>        | Name and<br>Address/email | As above                     | As above     | Y                                         |
| Consent for other<br>studies    | Drop Down                 | Y/N-Cancer<br>or Other trial |              | Y                                         |
| <b>Presentation</b>             |                           |                              |              |                                           |
| Presentation Mode               | Single select Drop down   |                              |              | N                                         |
| ECOG                            | Single select drop down   |                              |              | Y                                         |
| Charlson Index                  | Number                    |                              |              | Y                                         |

Table S2. Cont.

| Element Name                          | Type<br>(Fixed/Text)             | Length | Format | Source<br>Self-reported=Y<br>or Records=N |
|---------------------------------------|----------------------------------|--------|--------|-------------------------------------------|
| Private Insurance                     | Single select Drop down<br>(Y/N) |        |        | Y                                         |
| Smoking Status                        | Single select Drop down          |        |        | Y                                         |
| Prior Chemotherapy                    | Single select Drop down<br>(Y/N) |        |        | Y                                         |
| Prior Radiotherapy                    | Single select Drop down<br>(Y/N) |        |        | Y                                         |
| Infield Radiotherapy                  | Single select Drop down<br>(Y/N) |        |        | N                                         |
| Past History of<br>Cancer             | Single select Drop down<br>(Y/N) |        |        | Y                                         |
| Cancer Type                           | Single select drop down          |        |        | Y                                         |
| Treating Institution                  | Text                             | 250    |        | Y                                         |
| Age at diagnosis                      | Number                           |        | nn     | Y                                         |
| <b>Family History</b>                 |                                  |        |        |                                           |
| Number of siblings                    | Number                           |        | nn     | Y                                         |
| Number of children                    | Number                           |        | nn     | Y                                         |
| Family History of<br>cancer           | Single select Drop down          | (Y/N)  |        | Y                                         |
| Syndromes                             | Single select drop down          | 250    |        | No                                        |
| Cancer type                           | Single select drop down          | 250    |        | No                                        |
| Blood Relative<br>(1st or 2nd degree) | Single select Drop down          | 250    |        | Y                                         |
| Age of Onset                          | Number                           |        |        | No                                        |

## 2. Diagnosis and Treatment

Table S2. Cont.

| Element Name      | Type<br>(Fixed/Text)    | Length      | Format     | Source<br>Self-reported=Y<br>or Records=N |
|-------------------|-------------------------|-------------|------------|-------------------------------------------|
| <b>Diagnosis</b>  |                         |             |            |                                           |
| Date of Diagnosis | Date                    | Date picker | dd/mm/yyyy | N                                         |
| Formal stage      | Single select Drop down | 250         |            | N                                         |
| Staging methods   | Single select Drop down | 250         |            | N                                         |
| Tumour Stream     | Single select Drop down | 250         |            | N                                         |
| Other (Stream)    | Text                    |             |            | N                                         |

Table S2. Cont.

| Element Name                        | Type                             | Length                                          | Format          | Source                          |
|-------------------------------------|----------------------------------|-------------------------------------------------|-----------------|---------------------------------|
|                                     | (Fixed/Text)                     |                                                 |                 | Self-reported=Y<br>or Records=N |
| Tumour Site                         | Single select Drop down          | 250                                             | ICD10AM         | N                               |
| Laterality                          | Single select Drop down          | 250                                             |                 | N                               |
| Staging system                      | Single select drop down          | 250                                             |                 | N                               |
| Stage                               | Single select Drop down          | 250                                             |                 | N                               |
| Morphology                          | Single select Drop down          | 250                                             | ICD10AM         | N                               |
| Attached reports                    | Browse-add pdf                   | N/A                                             | Pdf (2MB limit) | N/A                             |
| <b>Treatment Summary</b>            |                                  |                                                 |                 |                                 |
| Treatment Intent                    | Single select Drop down          |                                                 |                 | N                               |
| Cancer Clinical Trial               | Single select Drop down          |                                                 |                 | N                               |
| Surgery                             | Single select Drop down          | (Y/N)                                           |                 | N                               |
| Date                                | Date picker                      | dd/mm/yyyy                                      |                 | N                               |
| Primary Procedure                   | Single select Drop down          |                                                 | ICD10AM         | N                               |
| Institution                         | Text                             | 250                                             |                 | N                               |
| <b>Radiotherapy</b>                 | Single select Drop down          | (Y/N)                                           |                 | N                               |
| Start Date                          | Date picker                      |                                                 | dd/mm/yyyy      | N                               |
| Target Site                         | Single select Drop down          |                                                 |                 | No                              |
| Dose                                | Number                           | (Gy)                                            | nn.nn           | No                              |
| Institution                         | Text                             | 250                                             |                 | N                               |
| Unit Record Number                  | Text                             | 15                                              |                 | N                               |
| Timing                              | Single select Drop down          | Adj, NeoAdj,<br>Adv                             |                 | N                               |
| Procedure                           | Single select Drop down          | Brachy, 131I-<br>Ablation,177<br>LuOct,<br>SABR |                 |                                 |
| <b>Chemotherapy</b>                 | Single select Drop down<br>(Y/N) | (Y/N)                                           |                 | N                               |
| Institution                         | Text                             | 250                                             |                 | N                               |
| Start Date                          | Date picker                      |                                                 | dd/mm/yyyy      | N                               |
| Unit Record Number                  | Text                             | 15                                              |                 | N                               |
| Timing                              | Single select Drop down          | Adj, NeoAdj,<br>Adv                             |                 | N                               |
| Line                                | Number                           | 250                                             | nn...           |                                 |
| Regimen                             | Single select Drop down          | 250                                             | Self-curated    | N                               |
| Drugs                               | Single select Drop down          | 250                                             | Self-curated    | N                               |
| Referral to Palliative<br>Care unit | Single select Drop down<br>(Y/N) | (Y/N)                                           |                 | N                               |
| Start Date                          | Date picker                      |                                                 | dd/mm/yyyy      | N                               |

## 3. FollowUP and OutComes

Table S2. Cont.

| Element Name                   | Type<br>(Fixed/Text)       | Length     | Format                                                                                                       | Source<br>Self-reported=Y<br>or Records=N |
|--------------------------------|----------------------------|------------|--------------------------------------------------------------------------------------------------------------|-------------------------------------------|
| <b>Patient Status</b>          |                            |            |                                                                                                              |                                           |
| Follow-up date                 | Date picker                |            | dd/mm/yyyy                                                                                                   | Yes                                       |
| Follow-up Number               | Single select<br>Drop down | Follow-up# | #1,2,3,4                                                                                                     |                                           |
| Status                         | Single select<br>dropdown  | 250        | Alive, Declined, Too unwell,<br>Benign, Deceased, No Response<br>Unknown                                     | Yes                                       |
| Date of death                  | Date picker                |            | dd/mm/yyyy                                                                                                   | No                                        |
| Death Date                     | Tick-box                   | 1          | Ticked/or unticked                                                                                           |                                           |
| Approximate<br>Cause of death  | Single select<br>dropdown  | 250        | Disease, Treatment, Other                                                                                    | No                                        |
| ECOG                           | Single select<br>dropdown  | 25         | 0-normal, 1-limited, 2-selfcare,<br>3-50% disabled, 4-100% disabled,<br>5-Death, **N/A–info N/A              | No                                        |
| <b>Disease Status</b>          |                            |            |                                                                                                              |                                           |
| Disease<br>recurred/progressed | Single select<br>dropdown  | (Y/N)      | If Y, then fields below Treatment<br>Summary open                                                            | No                                        |
| Date detected                  | Date Picker                |            | dd/mm/yyyy                                                                                                   | No                                        |
| Treatment summary              | Single select<br>Drop down |            | No Treatment, Ongoing 1st line,<br>New treatment                                                             |                                           |
| Cancer Clinical<br>Trial       | Single select<br>Drop down |            | No trial Phase 1, Phase 2, Phase 3,<br>Other Intervention,<br>Epidemiol/registry,<br>Psychosocial/sup, Other | N                                         |
| Surgery                        | Single select<br>Drop down | (Y/N)      |                                                                                                              | N                                         |
| Date                           | Date picker                | dd/mm/yyyy |                                                                                                              | N                                         |
| Primary Procedure              | Single select<br>Drop down |            | ICD10AM                                                                                                      | N                                         |
| Institution                    | Text                       | 250        |                                                                                                              | N                                         |
| <b>Radiotherapy</b>            | Single select<br>Drop down | (Y/N)      |                                                                                                              | N                                         |
| Start Date                     | Date picker                |            | dd/mm/yyyy                                                                                                   | N                                         |
| Target Site                    | Single select<br>Drop down |            |                                                                                                              | No                                        |
| Dose                           | Number                     | (Gy)       | nn.nn                                                                                                        | No                                        |
| Institution                    | Text                       | 250        |                                                                                                              | N                                         |

Table S2. Cont.

| Element Name                                    | Type (Fixed/Text)                | Length                                       | Format       | Source<br>Self-reported=Y<br>or Records=N |
|-------------------------------------------------|----------------------------------|----------------------------------------------|--------------|-------------------------------------------|
| Unit Record<br>Number                           | Text                             | 15                                           |              | N                                         |
| Timing                                          | Single select Drop down          | Adj, NeoAdj, Adv                             |              | N                                         |
| Procedure                                       | Single select Drop down          | Brachy, 131I-<br>Ablation, 177LuOct,<br>SABR |              |                                           |
| <b>Chemotherapy</b>                             | Single select Drop down<br>(Y/N) | (Y/N)                                        |              | N                                         |
| Institution                                     | Text                             | 250                                          |              | N                                         |
| Start Date                                      | Date picker                      |                                              | dd/mm/yyyy   | N                                         |
| Unit Record<br>Number                           | Text                             | 15                                           |              | N                                         |
| Timing                                          | Single select Drop down          | Adj, NeoAdj, Adv                             |              | N                                         |
| Line                                            | Number                           | 250                                          | nn...        |                                           |
| Regimen                                         | Single select Drop down          | 250                                          | Self-curated | N                                         |
| Drugs                                           | Single select Drop down          | 250                                          | Self-curated | N                                         |
| <b>Referral to<br/>Palliative Care<br/>unit</b> | Single select Drop down<br>(Y/N) | (Y/N)                                        |              | N                                         |
| Start Date                                      | Date picker                      |                                              | dd/mm/yyyy   | N                                         |
| Chemo drugs                                     | Single select dropdown           | 250                                          |              | No                                        |

#### 4. Biospecimen and Mutation Results

Table S2. Cont.

| Element Name              | Type (Fixed/Text)         | Length | Format              | Source<br>Self-reported=Y<br>or Records=N |
|---------------------------|---------------------------|--------|---------------------|-------------------------------------------|
| <b>Tumour Biospecimen</b> |                           |        |                     |                                           |
| Identifier                | Text box                  | 250    |                     | Y                                         |
| Collection Date           | Date Picker               |        | dd/mm/yyyy          | Y                                         |
| Tumour sample URN         | Text box                  | 250    |                     | Y                                         |
| Number of Samples         | Number                    | 250    | nnn...              | Y                                         |
| Source                    | Single select<br>dropdown | 25     | Biopsy<br>Resection | N                                         |
| Mutation Tested           | Single select<br>dropdown | (Y/N)  |                     | Y                                         |

Table S2. Cont.

| Element Name             | Type (Fixed/Text)         | Length | Format        | Source<br>Self-reported=Y<br>or Records=N |
|--------------------------|---------------------------|--------|---------------|-------------------------------------------|
| Recorded Date            | Date Picker               |        | dd/mm/yyyy    | Y                                         |
| Mutation Result          | Upload file               |        | Csv and pdf   | Y                                         |
| <b>Blood Biospecimen</b> |                           |        |               |                                           |
| Identifier               | Text box                  | 250    |               | Y                                         |
| Collection Date          | Date Picker               |        | dd/mm/yyyy    | Y                                         |
| Other Identifier         | Text box                  | 250    |               | Y                                         |
| Number of Samples        | Number                    | 250    | nnn...        | Y                                         |
| Source                   | Single select<br>dropdown | 25     | Plasma Pellet | N                                         |
| Mutation Tested          | Single select<br>dropdown | (Y/N)  |               | Y                                         |
| Recorded Date            | Date Picker               |        | dd/mm/yyyy    | Y                                         |
| Mutation Result          | Upload file               |        | Csv and pdf   | Y                                         |

## 5. Quality Of Life Surveys

Table S2. Cont.

| <b>QoL Surveys</b>   |                           |        |                                  |                                           |
|----------------------|---------------------------|--------|----------------------------------|-------------------------------------------|
| Element Name         | Type<br>(Fixed/Text)      | Length | Format                           | Source<br>Self-reported=Y<br>or Records=N |
| Period               | Single select<br>dropdown | 25     | Diagnosis,<br>Follow Up1, “”2... | Y                                         |
| QLQ-name             | Tick-box                  |        | -C30, -8D, -5D                   | Y                                         |
| Reason (missing)     | Single select<br>dropdown | 25     | N/A,<br>No response              | Y                                         |
| Add Survey           | Click to add              |        | QoL responses                    | Y                                         |
| Survey ID            | Text                      | 10     | Auto-generated                   | N/A                                       |
| Survey Date          | Date picker               |        | dd/mm/yyyy                       | Y                                         |
| QoL Link             | Single select<br>dropdown | 25     | Link to “Period”<br>above        | Y                                         |
| Missing Reason       | Text                      | 50     | N/A<br>No response               | Y                                         |
| Notes                | Text                      | 250    | Free txt                         | Y                                         |
| Date Created         | Date Stamp                |        | dd/mm/yyyy                       | N/A                                       |
| Date Modified (last) | Date Stamp                |        | dd/mm/yyyy                       | N/A                                       |
